# Supplementary material for: Sexually Transmitted Infections Prevalence and Cascade of Care among Undocumented Sex Workers: A Twenty-Year-Long Experience
Source: MDPI journal article supplement (doi:10.3390/life13030606), 2023-02-22
Supplement: s1 [file s1]

**Table S1.** Variables associated with a diagnosis of HIV, HCV, HBV, and syphilis, among 1035 undocumented migrants sex workers in Piacenza, Italy.

|                            | OR (95% CI)       | <i>p</i> -value | aOR (95% CI)      | <i>p</i> -value |
|----------------------------|-------------------|-----------------|-------------------|-----------------|
| Age, mean (SD)             | 1.07 (1.04-1.10)  | <0.001          | 1.03 (0.99-1.07)  | 0.074           |
| Transgender female         | 6.34 (3.9-10.28)  | <0.001          | 2.61 (1.17-5.80)  | 0.019           |
| Nigerian                   | 0.19 (0.12-0.31)  | <0.001          | 0.37 (0.19-0.73)  | 0.004           |
| Brasilian                  | 5.95 (3.68-9.62)  | <0.001          |                   |                 |
| Albania                    | 1.10 (0.33-3.69)  | 0.874           |                   |                 |
| Romania                    | 1.59 (0.81-3.12)  | 0.176           |                   |                 |
| Ecuador                    | 1.76 (0.67-4.64)  | 0.255           |                   |                 |
| Rest of South America      | 0.62 (0.08-4.72)  | 0.645           |                   |                 |
| Rest of Africa             | 0.92 (0.21-3.98)  | 0.914           |                   |                 |
| Rest of Europe             | 2.02 (0.92-4.45)  | 0.079           | 1.29 (0.52-3.22)  | 0.582           |
| Asia                       | 1                 |                 |                   |                 |
| Alcohol                    | 1.33 (0.86-2.06)  | 0.193           |                   |                 |
| Use of recreative drugs    | 7.36 (3.23-16.75) | <0.001          | 2.01 (0.82-5.67)  | 0.184           |
| PWID                       | 6.86 (3.50-13.46) | <0.001          | 1.86 (0.77-4.48)  | 1.70            |
| Primary level of education | 2.10 (1.35-3.27)  | 0.001           | 1.41 (0.87-2.32)  | 0.162           |
| Previous induced abortion  | 0.36 (0.23-0.56)  | <0.001          | 0.97 (0.53-1.79)  | 0.933           |
| Previous diagnosis of STI  | 1.31 (0.85-2.03)  | 0.225           |                   |                 |
| Reason for testing         |                   |                 |                   |                 |
| Screening                  | 0.58 (0.34-0.97)  | 0.038           | 2.19 (0.46-10.42) | 0.322           |
| Ongoing pregnancy          | 2.43 (1.09-5.38)  | 0.029           | 10.41 (1.76-61.6) | 0.010           |
| At risk intercourse        | 1                 |                 |                   |                 |
| Symptoms                   | 1.79 (0.91-3.53)  | 0.091           | 4.38 (0.83-23.07) | 0.081           |

SD: standard deviation; PWID: people who inject drugs; STIs: sexually transmitted infections.

**Table S2.** Variables associated with loss to follow-up after treatment among undocumented sex workers diagnosed with at least one STI.

|                            | OR (95% CI)       | <i>p</i> -value | aOR (95% CI)      | <i>p</i> -value |
|----------------------------|-------------------|-----------------|-------------------|-----------------|
| Age, mean (SD)             | 1.06 (1.02-1.10)  | 0.001           | 1.05 (1.01-1.10)  | 0.021           |
| Transgender female         | 2.23 (0.92-5.43)  | 0.101           |                   |                 |
| Nigerian                   | 0.50 (0.32-0.76)  | 0.001           | 1.19 (0.56-2.55)  | 0.645           |
| Brazilian                  | 3.22 (1.33-7.81)  | 0.009           | 4.60 (1.02-20.82) | 0.048           |
| Albania                    | 3.00 (0.98-9.13)  | 0.053           | 2.02 (0.53-2.55)  | 0.645           |
| Romania                    | 1.71 (0.92-3.17)  | 0.089           | 1.62 (0.68-3.85)  | 0.274           |
| Ecuador                    | 0.48 (0.15-1.49)  | 0.204           |                   |                 |
| Rest of South America      | 3.26 (0.59-18.01) | 0.176           |                   |                 |
| Rest of Africa             | 0.52 (0.14-1.96)  | 0.337           |                   |                 |
| Rest of Europe             | 1.36 (0.57-3.22)  | 0.490           |                   |                 |
| Alcohol                    | 1.02 (0.67-1.55)  | 0.940           |                   |                 |
| Use of recreative drugs    | 0.63 (0.12-3.31)  | 0.590           |                   |                 |
| PWID                       | 4.10 (0.79-21.4)  | 0.094           | 1.09 (0.15-8.15)  | 0.929           |
| Primary level of education | 1.18 (0.78-1.79)  | 0.429           |                   |                 |
| Previous induced abortion  | 0.96 (0.62-1.48)  | 0.856           |                   |                 |
| Previous diagnosis of STI  | 0.70 (0.46-1.07)  | 0.101           |                   |                 |
| Reason for testing         |                   |                 |                   |                 |
| Screening                  | 0.60 (0.34-1.07)  | 0.083           | 0.84 (0.42-1.68)  | 0.632           |
| Ongoing pregnancy          | 3.87 (0.98-15.19) | 0.053           | 3.59 (0.69-18.67) | 0.129           |
| At risk intercourse        | 0.53 (0.05-5.14)  | 0.584           |                   |                 |
| Symptoms                   | 1.35 (0.70-2.61)  | 0.372           |                   |                 |
| Diagnosis                  |                   |                 |                   |                 |
| Chlamydia                  | 0.62 (0.23-1.65)  | 0.341           |                   |                 |
| Gardnerella                | 2.07 (1.26-3.41)  | 0.004           | 1.74 (0.99-3.07)  | 0.055           |
| Syphilis                   | 2.16 (1.08-4.31)  | 0.030           | 0.36 (0.11-1.24)  | 0.107           |
| Ureaplasma                 | 0.38 (0.24-0.61)  | <0.001          | 0.64 (0.35-1.18)  | 0.152           |
| Mycoplasma                 | 0.60 (0.33-1.10)  | 0.099           | 0.68 (0.36-1.32)  | 0.258           |
| Trichomonas                | 2.72 (0.64-11.56) | 0.175           |                   |                 |
| HBV                        | 4.67 (1.46-14.96) | 0.009           | 4.04 (1.13-14.5)  | 0.032           |
| HCV                        |                   |                 |                   |                 |
| HIV                        | 4.87 (0.50-47.31) | 0.172           |                   |                 |
| HPV                        |                   |                 |                   |                 |

STIs: sexually transmitted infections; SD: standard deviation; PWID: people who inject drugs.
